# Supplementary material
Source: PubMed Central journal article supplement (PMC3490603)
Supplement: supp_pp.112.202705_202705SUPPLEMENTAL_DATA_1.pdf [file supp_pp.112.202705_202705SUPPLEMENTAL_DATA_1.pdf]

SUPPLEMENTAL DATA\_1

| Gene name | Prot size | Chr | Start    | Stop     | Strand | Type    | EST nb | Gene ID (V0 Genoscope, NCBI) | Gene ID (V1 CRIBI)        |
|-----------|-----------|-----|----------|----------|--------|---------|--------|------------------------------|---------------------------|
| VvSTS1    | 392       | 10  | 14216112 | 14217677 | plus   | pseudo* | 0      | GSVIVG01026213001            | VV10S0042G00840, 850, 860 |
| VvSTS2    | 392       | 10  | 14246885 | 14248453 | plus   | pseudo* | 3      | not defined                  | VV10S0042G00870           |
| VvSTS3    | 392       | 10  | 14264038 | 14265601 | plus   | pseudo* | 4      | not defined                  | VV10S0042G00880, 890      |
| VvSTS4    | 392       | 10  | 14284187 | 14285750 | plus   | pseudo* | 0      | not defined                  | VV10S0042G00910           |
| VvSTS5    | 392       | 10  | 14298957 | 14300520 | plus   | full    | 0      | not defined                  | VV10S0042G00920           |
| VvSTS6    | 392       | 10  | 14304787 | 14306350 | plus   | full    | 6      | GSVIVG01026220001            | VV10S0042G00930           |
| VvSTS7    | 392       | 16  | 16239028 | 16240564 | plus   | full    | 17*    | not defined                  | VV16S0100G00750           |
| VvSTS8    | nd        | 16  | 16252494 | 16254029 | plus   | pseudo  | 0      | not defined                  | VV16S0100G00760           |
| VvSTS9    | 392       | 16  | 16268816 | 16270352 | plus   | full    | 13*    | GSVIVG01010590001            | VV16S0100G00770           |
| VvSTS10   | 392       | 16  | 16276570 | 16278105 | plus   | full    | 26*    | GSVIVG01010589001            | VV16S0100G00780           |
| VvSTS11   | nd        | 16  | 16284807 | 16285039 | minus  | pseudo  | 0      | not defined                  | not defined               |
| VvSTS12   | nd        | 16  | 16286924 | 16287922 | minus  | partial | 2      | not defined                  | VV16S0100G00800           |
| VvSTS13   | nd        | 16  | 16289537 | 16290882 | minus  | partial | 5      | not defined                  | VV16S0100G00810           |
| VvSTS14   | nd        | 16  | 16323781 | 16324386 | minus  | partial | 1      | not defined                  | not defined               |
| VvSTS15   | 392       | 16  | 16335697 | 16337233 | plus   | full    | 8*     | not defined                  | VV16S0100G00830           |
| VvSTS16   | 392       | 16  | 16343202 | 16344516 | minus  | full    | 3      | GSVIVG01010585001            | VV16S0100G00840           |
| VvSTS17   | 392       | 16  | 16346580 | 16347949 | minus  | full    | 15*    | GSVIVG01010584001            | VV16S0100G00850           |
| VvSTS18   | 392       | 16  | 16350059 | 16351428 | minus  | pseudo* | 25*    | GSVIVG01010583001            | VV16S0100G00860           |
| VvSTS19   | 392       | 16  | 16366907 | 16368410 | minus  | full    | 3      | GSVIVG01010582001            | VV16S0100G00880           |
| VvSTS20   | 392       | 16  | 16386013 | 16387529 | minus  | full    | 18*    | GSVIVG01010581001            | VV16S0100G00900           |
| VvSTS21   | 392       | 16  | 16398234 | 16399770 | plus   | full    | 8*     | not defined                  | VV16S0100G00910           |
| VvSTS22   | 392       | 16  | 16405205 | 16406519 | minus  | full    | 5      | GSVIVG01010580001            | VV16S0100G00920           |
| VvSTS23   | 392       | 16  | 16408469 | 16409837 | minus  | full    | 19*    | GSVIVG01010579001            | VV16S0100G00930           |
| VvSTS24   | 392       | 16  | 16411948 | 16413317 | minus  | full    | 26*    | GSVIVG01010578001            | VV16S0100G00940           |
| VvSTS25   | nd        | 16  | 16431088 | 16431720 | minus  | partial | 32     | not defined                  | VV16S0100G00950           |
| VvSTS26   | nd        | 16  | 16440517 | 16441617 | minus  | partial | 3      | not defined                  | VV16S0100G00960           |
| VvSTS27   | 392       | 16  | 16467015 | 16468549 | minus  | full    | 13*    | not defined                  | VV16S0100G00990           |
| VvSTS28   | 392       | 16  | 16477097 | 16478613 | minus  | full    | 25     | not defined                  | VV16S0100G01000           |
| VvSTS29   | 392       | 16  | 16491597 | 16493131 | minus  | full    | 17*    | not defined                  | VV16S0100G01010           |
| VvSTS30   | 392       | 16  | 16503636 | 16505168 | minus  | full    | 2      | GSVIVG01010574001            | VV16S0100G01020           |
| VvSTS31   | 392       | 16  | 16507942 | 16509479 | minus  | full    | 13*    | not defined                  | VV16S0100G01030           |
| VvSTS32   | 392       | 16  | 16511216 | 16512602 | plus   | full    | 4      | GSVIVG01010572001            | VV16S0100G01040           |
| VvSTS33   | nd        | 16  | 16520734 | 16521936 | minus  | pseudo  | 0      | GSVIVG01010570001            | VV16S0100G01060           |
| VvSTS34   | nd        | 16  | 16523409 | 16523861 | minus  | pseudo  | 0      | not defined                  | not defined               |
| VvSTS35   | 392       | 16  | 16526326 | 16527862 | minus  | full    | 38*    | GSVIVG01010568001            | VV16S0100G01070           |
| VvSTS36   | 392       | 16  | 16555945 | 16557435 | minus  | full    | 28*    | GSVIVG01010565001            | VV16S0100G01100           |
| VvSTS37   | 392       | 16  | 16587447 | 16588984 | minus  | full    | 5      | not defined                  | VV16S0100G01110           |
| VvSTS38   | 392       | 16  | 16607176 | 16608730 | minus  | full    | 9*     | GSVIVG01010563001            | VV16S0100G01110           |
| VvSTS39   | 392       | 16  | 16615702 | 16617258 | minus  | full    | 6      | not defined                  | VV16S0100G01120           |
| VvSTS40   | nd        | 16  | 16618991 | 16620545 | minus  | pseudo  | 0      | not defined                  | VV16S0100G01130           |
| VvSTS41   | 392       | 16  | 16623086 | 16624624 | minus  | full    | 15*    | not defined                  | VV16S0100G01130           |
| VvSTS42   | 392       | 16  | 16627536 | 16629091 | minus  | full    | 8      | GSVIVG01010561001            | VV16S0100G01140           |
| VvSTS43   | 392       | 16  | 16644190 | 16645747 | minus  | full    | 5*     | not defined                  | VV16S0100G01150           |
| VvSTS44   | nd        | 16  | 16647473 | 16649027 | minus  | pseudo  | 0      | not defined                  | not defined               |
| VvSTS45   | 392       | 16  | 16673986 | 16675524 | minus  | full    | 25     | GSVIVG01010557001            | VV16S0100G01160           |
| VvSTS46   | 392       | 16  | 16682709 | 16684264 | minus  | full    | 17     | GSVIVG01010556001            | VV16S0100G01170           |
| VvSTS47   | 392       | 16  | 16698303 | 16699842 | minus  | full    | 23*    | GSVIVG01010554001            | VV16S0100G01190           |
| VvSTS48   | 392       | 16  | 16710281 | 16711818 | minus  | full    | 81*    | not defined                  | VV16S0100G01200           |
| VvCHS1    | 393       | 14  | 24673534 | 24674845 | plus   | full    | >200*  | GSVIVG01032968001            | VV14S0068G00920           |
| VvCHS2    | 393       | 14  | 24687036 | 24688374 | plus   | full    | >200*  | not defined                  | VV14S0068G00930           |
| VvCHS3    | 389       | 5   | 13597483 | 13599348 | plus   | full    | >200*  | GSVIVG01000521001            | VV05S0136G00260           |
| VvCHSL1   | 392       | 3   | 1006320  | 1007936  | plus   | full    | 0      | GSVIVG01024107001            | VV03S0038G01460           |
| VvCHSL2   | 389       | 15  | 13099195 | 13100654 | minus  | full    | 4*     | GSVIVG01018219001            | VV15S0021G02170           |
| VvCHSL3   | nd        | nd  | 39310453 | 39311279 | minus  | partial | 0      | not defined                  | not defined               |
| VvCHSL4   | 381       | 16  | 12591519 | 12592910 | plus   | pseudo* | 0      | not defined                  | VV16S0022G01000           |
| VvCHSL5   | 384       | 16  | 12636904 | 12638528 | plus   | full    | 0      | not defined                  | VV16S0022G01020           |
| VvCHSL6   | nd        | 16  | 12709873 | 12710073 | plus   | pseudo  | 0      | not defined                  | not defined               |
| VvCHSL7   | nd        | 16  | 12725807 | 12727082 | plus   | pseudo  | 0      | not defined                  | not defined               |
| VvCHSL8   | 343       | 16  | 12763168 | 12764673 | plus   | full    | 0      | not defined                  | VV16S0022G01020           |
| VvCHSL9   | nd        | 16  | 12826871 | 12827452 | plus   | partial | 0      | not defined                  | not defined               |
| VvCHSL10  | 386       | 16  | 12946634 | 12949378 | plus   | full    | 0      | not defined                  | VV16S0022G01140           |
| VvCHSL11  | 386       | 16  | 13045635 | 13047296 | plus   | full    | 0      | not defined                  | VV16S0022G01190           |

**Table S1:** Detailed annotation and nomenclature of the *STS* and *CHS* gene families of *V. vinifera* PN40024.

Column legend:

- Gene name: Stilbene Synthase (*STS*), Chalcone Synthase (*CHS*) and Chalcone Synthase-like (*CHSL*).
- Prot. size: Number of amino acid encoded by the predicted CDS. The protein size is not defined (nd) for pseudogenes and partial genes.
- Chr: Chromosome number. Note that the *VvCHSL3* gene is localized on an unmapped scaffold.
- Start and Stop: Positions of predicted CDS relative to the 12x PN40024 pseudochromosomes. Complete curated intron-exon structures are available in the FLAGdb<sup>++</sup> database (<http://urgv.evry.inra.fr/FLAGdb>). Final CDS are also available as a multifasta file (Supplemental Data 2).
- Strand: chromosome strand.
- Type: Full (complete perfect CDS), partial (suspended by an unsequenced region) and pseudo (probable pseudogene disrupted by numerous stop codons, frameshifts and/or small deletions). \* means that there is only one fatal position in the predicted CDS (*i.e.* one frameshift or one stop codon) which can be the result of a sequencing error.
- EST nb: Number of cognate EST/cDNA in the available transcript resources. \* means that the whole CDS is covered by the EST/cDNA contig.

Gene ID: Corresponding name in the official automatic annotation (v0) of the 12x PN40024 genome obtained with GAZE (<http://www.genoscope.cns.fr/externe/GenomeBrowser/Vitis/>). Note that the structure of the genes predicted by GAZE can be different of the curated ones described in this paper. Not defined means that the gene have not been predicted by GAZE. Cross-links with the gene IDs from the v1 annotation of the 12x PN40024 genome (CRIBI, <http://genomes.cribi.unipd.it/>) are provided.

| Compound | RT   | structure                             | ESIMS(-) | formula                                        | MS/MS    | formula                                        | MS/MS    | formula                                       |
|----------|------|---------------------------------------|----------|------------------------------------------------|----------|------------------------------------------------|----------|-----------------------------------------------|
| A        | 1,68 | resveratrol-O-hexoside                | 389,1245 | C <sub>20</sub> H <sub>21</sub> O <sub>8</sub> | 227,0709 | C <sub>14</sub> H <sub>11</sub> O <sub>3</sub> | 161,0444 | C <sub>6</sub> H <sub>9</sub> O <sub>5</sub>  |
| B        | 2,56 | trans-piceid                          | 389,1248 | C <sub>20</sub> H <sub>21</sub> O <sub>8</sub> | 227,0710 | C <sub>14</sub> H <sub>11</sub> O <sub>3</sub> | 161,0439 | C <sub>6</sub> H <sub>9</sub> O <sub>5</sub>  |
| C        | 2,94 | cis-piceid                            | 389,1248 | C <sub>20</sub> H <sub>21</sub> O <sub>8</sub> | 227,0710 | C <sub>14</sub> H <sub>11</sub> O <sub>3</sub> | 161,0445 | C <sub>6</sub> H <sub>9</sub> O <sub>5</sub>  |
| D        | 3,17 | piceid methyl ether                   | 403,1403 | C <sub>21</sub> H <sub>23</sub> O <sub>8</sub> | 241,0868 | C <sub>15</sub> H <sub>13</sub> O <sub>3</sub> | 161,0440 | C <sub>6</sub> H <sub>9</sub> O <sub>5</sub>  |
| E        | 3,33 | piceid methyl ether                   | 403,1404 | C <sub>21</sub> H <sub>23</sub> O <sub>8</sub> | 241,0869 | C <sub>15</sub> H <sub>13</sub> O <sub>3</sub> | 161,0444 | C <sub>6</sub> H <sub>9</sub> O <sub>5</sub>  |
| F        | 3,41 | resveratrol methyl ether - O-hexoside | 445,1510 | C <sub>23</sub> H <sub>25</sub> O <sub>9</sub> | 241,0860 | C <sub>15</sub> H <sub>13</sub> O <sub>3</sub> | 203,0558 | C <sub>8</sub> H <sub>11</sub> O <sub>6</sub> |
| G        | 3,53 | resveratrol methyl ether - O-hexoside | 445,1508 | C <sub>23</sub> H <sub>25</sub> O <sub>9</sub> | 241,0867 | C <sub>15</sub> H <sub>13</sub> O <sub>3</sub> | 203,0556 | C <sub>8</sub> H <sub>11</sub> O <sub>6</sub> |
| H        | 4,82 | pterostilbene                         | 255,1025 | C <sub>16</sub> H <sub>15</sub> O <sub>3</sub> |          |                                                |          |                                               |

**Table S2** : MS/MS characterization of resveratrol derivatives produced in *N. benthamiana* leaves following transient *STS* expression

RT: retention time in min,

ESIMS(-): Compound mass in negative ion mode electrospray ionization mass spectrometry ([M-H]<sup>-</sup>)

MS/MS: fragment mass

| Gene    | Piceid ( <i>cis</i> and <i>trans</i> )<br>µg/gFW | Pterostilbene<br>µg/gFW |
|---------|--------------------------------------------------|-------------------------|
| VvSTS5  | 13,79 ±1,82                                      | 1,22 ±0,14              |
| VvSTS10 | 14,42 ±1,07                                      | 1,70 ±0,20              |
| VvSTS16 | 8,59 ±1,77                                       | 1,34 ±0,33              |
| VvSTS28 | 13,88 ±1,34                                      | 1,22 ±0,14              |
| VvSTS29 | 12,60 ±2,90                                      | 1,83 ±0,51              |
| VvSTS36 | 10,67 ±0,99                                      | 1,34 ±0,20              |
| VvSTS38 | 12,66 ±2,04                                      | 2,11 ±0,32              |
| VvSTS46 | 6,26 ±1,65                                       | 1,24 ±0,17              |
| VvSTS48 | 11,75 ±1,80                                      | 1,19 ±0,24              |

**Table S3**: Quantification of stilbenes in *N. benthamiana* leaves following transient *STS* expression

Only cis-piceid, trans-piceid and trans-pterostilbene were quantified, as these compounds were available as authentic standards. Traces amounts of resveratrol were detected in some samples. Results correspond to the mean (± SD) of 6 experiments, expressed as µg per g (fresh weight) of leaf.

|                             | <b>Sequence Name</b>   | <b>CDS AN</b> | <b>Protein AN</b> |
|-----------------------------|------------------------|---------------|-------------------|
| <i>Arachis hypogaea</i>     | AhCHS                  | AY735111      | AAU43217          |
|                             | AhCHS1                 | AY192572      | AAO32821          |
|                             | AhSTS                  | AB027606      | BAA78617          |
|                             | AhSTS1                 | A00769        | CAA00091          |
|                             | AhSTS3                 | L00952        | AAA96434          |
| <i>Arabidopsis thaliana</i> | AtCHS                  | AY044331      | AAK73272          |
| <i>Psilotum nudum</i>       | PnCHS                  | AB022682      | BAA87922          |
|                             | PnCHSSF                | AB040027      | BAA92742          |
|                             | PnSTS                  | AB022684      | BAA87924          |
|                             | PnSTSB                 | AB022685      | BAA87925          |
| <i>Pinus strobus</i>        | PstrCHS                | AJ004800      | CAA06077          |
|                             | PstrCHSL               | AJ002156      | CAA05214          |
|                             | PstrSTS1               | Z46914        | CAA87012          |
|                             | PstrSTS2               | Z46915        | CAA87013          |
| <i>Pinus sylvestris</i>     | PsylCHS                | X60754        | CAA43166          |
|                             | PsylSTS                | X60753        | CAA43165          |
| <i>Populus trichocarpa</i>  | PtCHS1                 | DQ371804      | EEE99396          |
|                             | PtCHS2                 | CM000337      | EEE84086          |
|                             | PtCHS3                 | CM000337      | EEE84087          |
|                             | PtCHS4                 | CM000339      | EEE78798          |
|                             | PtCHS5                 | CM000339      | EEE78799          |
|                             | PtCHS6                 | CM000339      | EEE78800          |
|                             | PtCHS7                 | EQ140118      | EEF06787          |
|                             | PtCHSL1                | CM000337      | EEE84002          |
|                             | PtCHSL2                | DS017597      | EEE73513          |
|                             | <i>Sorghum bicolor</i> | SbCHS1        | AF152548          |
| SbCHS2                      |                        | AF152549      | AAD41874          |
| SbCHS3                      |                        | AF152550      | AAD41875          |
| SbCHS4                      |                        | AF152551      | AAD41876          |
| SbCHS5                      |                        | AF152552      | AAD41877          |
| SbCHS6                      |                        | AF152553      | AAD41878          |
| SbCHS7                      |                        | AF152554      | AAD41879          |
| SbSTS1                      |                        | AY069951      | AAL49965          |

**Table S4** : Species, sequence names, CDS and proteins accession numbers (AN) of the sequences used in the multispecies analysis.

| Model                 | Proportion of sites |          |                        | dN/dS ratios                                                    |                                                     |                                                                    | Likelihood   |                                                  |
|-----------------------|---------------------|----------|------------------------|-----------------------------------------------------------------|-----------------------------------------------------|--------------------------------------------------------------------|--------------|--------------------------------------------------|
|                       |                     |          |                        |                                                                 |                                                     |                                                                    | InL          | P-value                                          |
| <b>Multispecies</b>   |                     |          |                        |                                                                 |                                                     |                                                                    |              |                                                  |
| <b>BModel</b><br>w2   |                     |          |                        | wb=0.077<br>CHS                                                 | wf1=0.084<br>STS Vv                                 | wf2=0.179<br>STS o                                                 | -28279.42215 | 0<br>(<e-308)<br>(BM w0)<br>0.331103<br>(BM w1o) |
| <b>BModel</b><br>w1v  |                     |          |                        | wb=0.095<br>CHS+STS o                                           | wf=0.084<br>STS Vv                                  |                                                                    | -28318.90344 | 0.159322                                         |
| <b>BModel</b><br>w1o  |                     |          |                        | wb=0.079<br>CHS+STS Vv                                          | wf=0.178<br>STS o                                   |                                                                    | -28279.89444 | 0<br>(<e-308)                                    |
| <b>BModel</b><br>w1vo |                     |          |                        | wb=0.078<br>CHS                                                 | wf=0.120<br>STS Vv +<br>STS o                       |                                                                    | -28302.34656 | 3.14 E-09                                        |
| <b>BM</b><br>control  |                     |          |                        | w0= 0.093                                                       |                                                     |                                                                    | -28319.89376 |                                                  |
| <b>CModel</b>         | p0=0.438            | p1=0.047 | p2=0.516               | w0b=0.021<br>CHS<br>w0f1=0.021<br>STS Vv<br>w0f2=0.021<br>STS o | w1b=1<br>CHS<br>w1f1=1<br>STS Vv<br>w1f2=1<br>STS o | w2b=0.1183<br>CHS<br>w2f1=0.1179<br>STS Vv<br>w2f2=0.2891<br>STS o | -27715.85062 | 0<br>(<e-308)                                    |
| <b>CM</b><br>control  |                     |          |                        |                                                                 |                                                     |                                                                    | -28114.09939 |                                                  |
| <b>FM2a</b>           | p1=0.511            | p2=0.059 | p3=0.091               | w1=<br>0.00001                                                  | w2=0.153                                            | w3=1                                                               | -27592.35651 | 0<br>(<e-308)                                    |
| <b>FMX</b>            | p0=0.866            | p1=0.132 | p2=0.002               | w0=<br>0.024421                                                 | w1=1.000<br>017                                     | w2=9.99985                                                         | -27699.07975 | 0<br>(<e-308)                                    |
| <b>FM</b><br>control  |                     |          |                        |                                                                 |                                                     |                                                                    | -27752.59095 |                                                  |
| <b>Vitis vinifera</b> |                     |          |                        |                                                                 |                                                     |                                                                    |              |                                                  |
| <b>BModel</b>         |                     |          |                        | wb=0.089<br>CHS                                                 | wf=0.083<br>STS                                     |                                                                    | -11840.90213 | 0.554592                                         |
| <b>BM</b><br>control  |                     |          |                        | w0= 0.085                                                       |                                                     |                                                                    | -11841.07671 |                                                  |
| <b>BSite</b>          | p0=0.923            | p1=0.061 | p2a=0.015<br>p2b=0.001 | w0b=0.059<br>CHS<br>w0f=0.059<br>STS                            | w1b=1<br>CHS<br>w1f=1<br>STS                        | w2ba=0.059<br>CHS<br>w2fa,2bb,2fb<br>=1<br>STS,CHS,STS             | -11702.85446 | 1                                                |
| <b>BS</b><br>control  |                     |          |                        |                                                                 |                                                     |                                                                    | -11702.85446 |                                                  |
| <b>CModel</b>         | p0=0.421            | p1=0.050 | p2=0.529               | w0b=0.017<br>CHS<br>w0f=0.017<br>STS                            | w1b=1<br>CHS<br>w1f=1<br>STS                        | w2b=0.148<br>CHS<br>w2f=0.082<br>STS                               | -11634.15808 | 0<br>(<e-308)                                    |
| <b>CM</b>             |                     |          |                        |                                                                 |                                                     |                                                                    | -11706.64354 |                                                  |

|                   |          |          |          |                     |          |          |              |           |
|-------------------|----------|----------|----------|---------------------|----------|----------|--------------|-----------|
| <b>control</b>    |          |          |          |                     |          |          |              |           |
| <b>FM2a</b>       | p1=0.909 | p2=0.054 | p3=0.038 | w1=0.024            | w2=1     | w3=1.660 | -11611.94129 | 1.03 E-14 |
| <b>FMX</b>        | p0=0.608 | p1=0.314 | p2=0.078 | w0=0<br>(<0.000001) | w1=0.107 | w2=1.316 | -11608.49082 | 3.33 E-16 |
| <b>FM control</b> |          |          |          |                     |          |          | -11641.17816 |           |

**Table S5** : Main results of the dN/dS analyses of the “multispecies” and “*Vitis vinifera*” sets of sequences.

BModel or BM = branch model; CModel or CM = clade model; FM = fit model (M2a model and MX model, see M&M section); BSite or BS = branch site model; control = null model; w = dN/dS; b = background; f = foreground; p0, p1, p2, p3 = proportion of sites with dN/dS ratios = w0, w1, w2 and w3, respectively (same colour for corresponding p and w); STS Vv = STS from *Vitis vinifera*; STS o = STS from other species than *Vitis vinifera* (see Table S1); lnL = ln of the likelihood; P-value = p-value of the likelihood ratio test.

|            | Gene                | Forward primer                                                          | Reverse primer                                                  |
|------------|---------------------|-------------------------------------------------------------------------|-----------------------------------------------------------------|
| <b>A</b>   | VvSTS5              | CTTTGAAGCTCTGTGGGGATTTACTAGTCATCA                                       | ATTTGATTTAATAGAAATTGTCGCCCTCTGATTT                              |
|            | VvSTS10             | CCTCAATCTTCAGCTTCAATTTGAGTTCGTAGCTAGGAT                                 | GTAGCACCTCCTCTGTAATACAATAAGACATGTCC                             |
|            | VvSTS16             | AACTTTTAAGCTTCGATTTTCAGCAGTCATCCTACTA                                   | ATTTAAGGTCTCCAAGGAAATCCTCCAACAATTC                              |
|            | VvSTS28             | TTGAAGCTTCCATTTTCAGTAGTCATCACACATATCAATG                                | GATTTTGACTTGAGGTCTTTGAGGAGTTCCTCC                               |
|            | VvSTS29             | CCAAGCACTTGTGCACACTGAGTTCTCTTTCCCTTCC                                   | AGTTTCGGAGATAAATACCTTACTCCTATTCAAC                              |
|            | VvSTS36             | CTCAACCAGCTCCAAGCACTCTTCTCTTTCCCTTC                                     | ACCGTAGAACATCAAAGGTACCATTCCCTTCCAC                              |
|            | VvSTS38             | GTTCTCTTTTCTTTCCAATTGGAGTAGCAGCAATG                                     | CTTTGAACTGGAGGTCTACTAAGGAAGCCCTCCAGC                            |
|            | VvSTS46             | CAGTTGAGTTCCTTTTCCCTTCCCAACTTAATC                                       | GATTACATTAAGACATTGAAGGGTTCGAGC                                  |
|            | VvSTS48             | GACAGGTATAAAAGCCCGGCACCCACAACCAGCT                                      | CCTATTTGATACATTACTGCATTGAAGGGTAAACC                             |
| <b>B</b>   | VvSTS5 Gateway      | GGGGACAAGTTTGTACAAAAAGCAGGCTTGGTTCCGCGTGGATCAATGGCATCTGTGGAGGACATTAGA   | GGGGACCACTTTGTACAAGAAAGCTGGGTTTCATCAATTTGTAGCCCCAGCAACG         |
|            | VvSTS10 Gateway     | GGGGACAAGTTTGTACAAAAAGCAGGCTTGGTTCCGCGTGGATCAATGGCTTCAATTGAGGAAATTAGAAA | GGGGACCACTTTGTACAAGAAAGCTGGGTTTCATCAATTTGTAAACCATAGGAACCGCTATG  |
|            | VvSTS16 Gateway     | GGGGACAAGTTTGTACAAAAAGCAGGCTTGGTTCCGCGTGGATCAATGGCTTCAGTCGAGGAAATTAGAAA | GGGGACCACTTTGTACAAGAAAGCTGGGTTTCATCAATTGGAATCCCTAGGAATACTGTG    |
|            | VvSTS28 Gateway     | GGGGACAAGTTTGTACAAAAAGCAGGCTTGGTTCCGCGTGGATCAATGGCTTCAGTCGAGGAAATTAGAAA | GGGGACCACTTTGTACAAGAAAGCTGGGTTTCATCAATTTGGAATCCGTACCAACCGCTAT   |
|            | VvSTS29 Gateway     | GGGGACAAGTTTGTACAAAAAGCAGGCTTGGTTCCGCGTGGATCAATGGCTTCAGTCGAGGAAATTAGAAA | GGGGACCACTTTGTACAAGAAAGCTGGGTTTCATTAATTTGTACCATAGGAATGCTATGC    |
|            | VvSTS36 Gateway     | GGGGACAAGTTTGTACAAAAAGCAGGCTTGGTTCCGCGTGGATCAATGGCTTCAGTCGAGGAAATTAGAAA | GGGGACCACTTTGTACAAGAAAGCTGGGTTTCATTAATTTATAACTGTAGGAATGCTACGCAG |
|            | VvSTS38 Gateway     | GGGGACAAGTTTGTACAAAAAGCAGGCTTGGTTCCGCGTGGATCAATGGCTTCAGTCGAGGAAATTAGAAA | GGGGACCACTTTGTACAAGAAAGCTGGGTTTCATCAATTTGTACCCGTGGCAACG         |
|            | VvSTS46 Gateway     | GGGGACAAGTTTGTACAAAAAGCAGGCTTGGTTCCGCGTGGATCAATGGCATCTGTGGAGGACATTAGA   | GGGGACCACTTTGTACAAGAAAGCTGGGTTTCATTAATTTGTAAACCGTAGGAATGCTATGC  |
|            | VvSTS48 Gateway     | GGGGACAAGTTTGTACAAAAAGCAGGCTTGGTTCCGCGTGGATCAATGGCTTCAGTTGAGGAAATTAGAAA | GGGGACCACTTTGTACAAGAAAGCTGGGTTTCATTAATTTGTAAACCGTAGGAATGCTATGC  |
| <b>C</b>   | VvSTS5/6            | CTGAAACCCATTTAGACTCT                                                    | GAAATTGTCCCTTGTGATT                                             |
|            | VvSTS7              | GGGTCTTGAACTTCAGTTAGA                                                   | GTCTCTACAATCTCCAACGAT                                           |
|            | VvSTS9              | CCTCTTCAGCTCGTCT                                                        | TCAATAAGATAGGGATCATATATCA                                       |
|            | VvSTS10/15/21       | AAATAACGCAGGAGCACGA                                                     | GATTTAGGAGTACTATTATTAAC                                         |
|            | VvSTS16/22          | CTGAAACTGCTTTGGACTCT                                                    | GTTGCGATAACTTCGTTATTGT                                          |
|            | VvSTS17/23/24       | GTTTGATATCTGAAAACATAGAG                                                 | AGATGATTTTCATGGTGATATATC                                        |
|            | VvSTS19/20/28/30    | ACTCTTTCAACTTGTTTCAGCA                                                  | TCCAACAATCGTAAAATAACAATTCA                                      |
|            | VvSTS27/29/31       | CAATGTGCCACTTTAATTTCTG                                                  | CAGTCTGAACTTGAACCTCAAC                                          |
|            | VvSTS32             | CTGAATCCGCTTTGGACTCT                                                    | CCATCTCTCTATGGCTCACAA                                           |
|            | VvSTS35/48          | AGGTACCTAGACTTGGTAG                                                     | AAGGGTCAACCATTCTCTTTTA                                          |
|            | VvSTS36             | CTTGATAACTCAGTTAGAAGAGTT                                                | ATCAAAGGTACCATTCCCTT                                            |
|            | VvSTS37             | TGCCATTGCCGGAACCTTAC                                                    | GAGTATTGAAAAGACCATTCTCC                                         |
|            | VvSTS38             | CTTGATAACTCAGTTAGAAGAGTT                                                | TGGAAAGCTTCTCCTTATGAC                                           |
|            | VvSTS39/43          | TGCTGAGGTACCCAACTC                                                      | ATTTCCAGCTCACAAAGAAAGTCTA                                       |
|            | VvSTS41/45          | AGGTACCTAGACTTGGTAG                                                     | AATCCAAATTTACCAATGTGATG                                         |
| VvSTS42/46 | TTTCAGCTCGTCTCAGCAG | ATTAAGACATTGAAGGGTTCGAGC                                                |                                                                 |

**Table S6: Primers**

Primers used for PCR amplification of STS genes from *Vitis vinifera* PN40024 genomic DNA (A), for cloning into the Gateway-compatible entry vector pDONR207 (B) and for semi-quantitative RT-PCR (C).

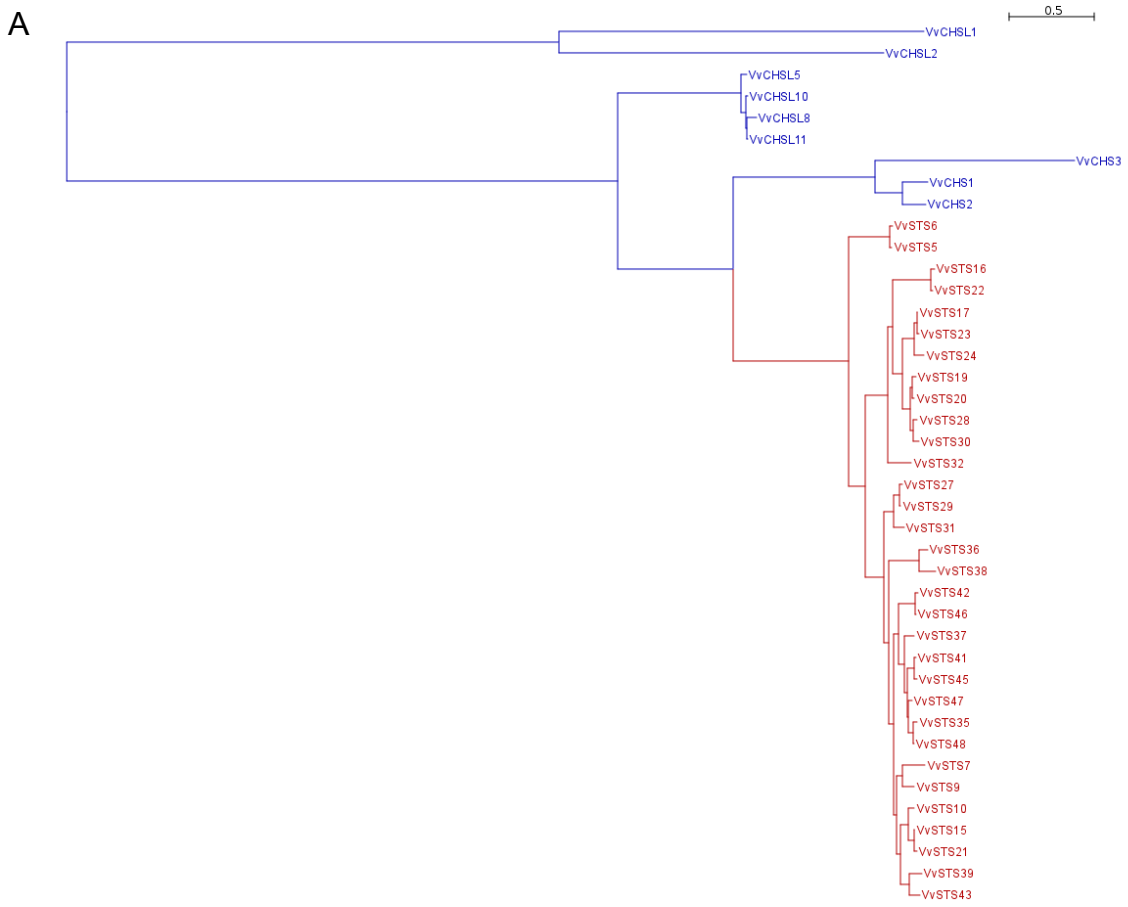



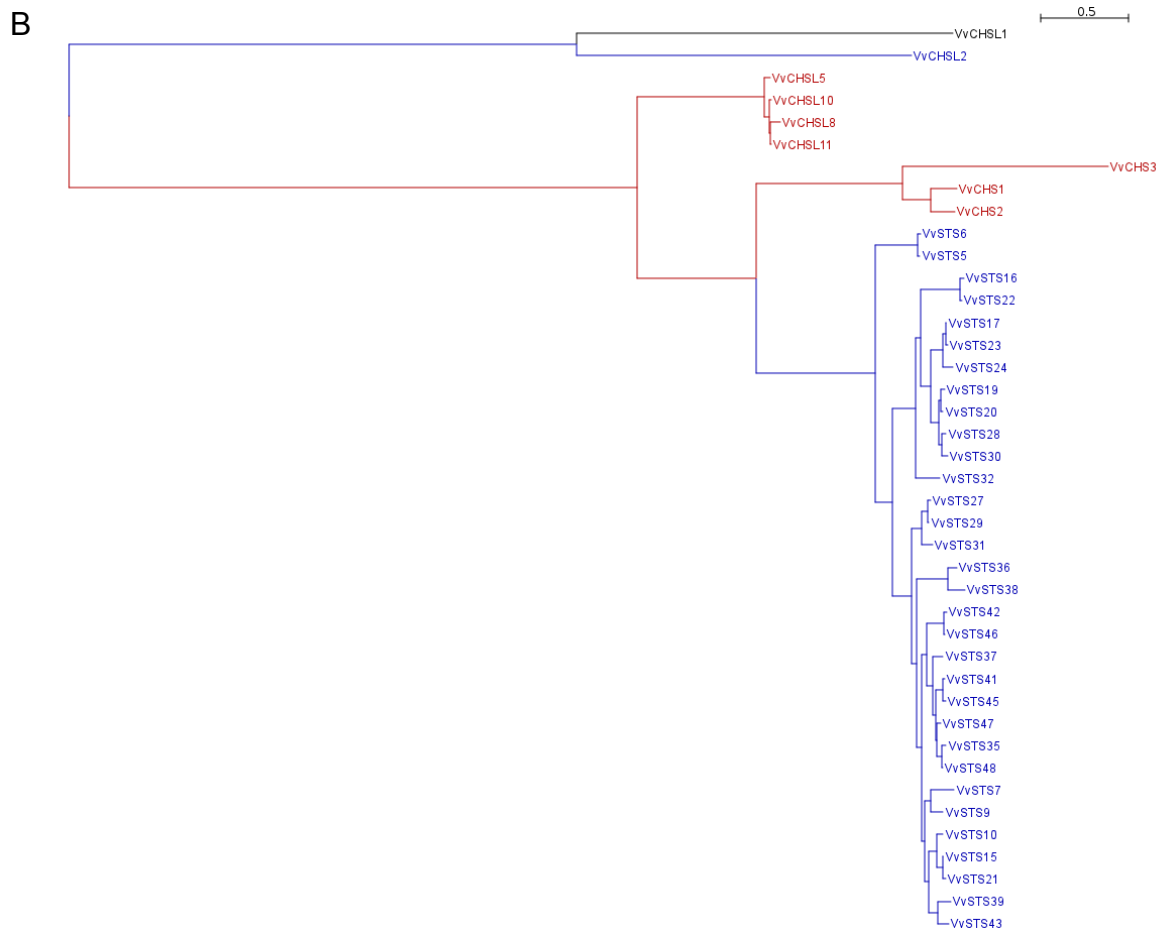

**Figure S1:**

Phylogenetic trees of the *Vitis vinifera* set of sequences showing the Fitmodel results for 2 contrasted sites evolving under A) positive selection ( $V_{230}$  in VvSTS10); B) purifying selection ( $S_{231}$  in VvSTS10) in *Vitis* STS proteins. Different colours indicate higher posterior probabilities of evolving under different selection regimes: red = positive selection; blue = purifying selection; black = neutral evolution.
